# Supplementary material for: Downregulation of LOX promotes castration-resistant prostate cancer progression via IGFBP3
Source: PubMed Central journal article supplement (PMC8734407; doi:10.7150/jca.61131), 2021-10-28
Supplement: jcav12p7349s1.pdf [file jcav12p7349s1.pdf]

## Supplementary information

### **Downregulation of LOX promotes castration-resistant prostate cancer progression via IGFBP3**

Xuanrong Chen<sup>1,\*</sup>, Yi Shao<sup>1,\*</sup>, Wanqing Wei<sup>1,2,\*</sup>, Haishan Shen<sup>3,\*</sup>, Yang Li<sup>1</sup>, Yutong Chen<sup>1</sup>, Qianwang Ma<sup>1</sup>, Hanlin Li<sup>1</sup>, Zhao Yang<sup>1</sup>, Yuanjie Niu<sup>1,#</sup>, Zhiqun Shang<sup>1,#</sup>

<sup>1</sup>Department of Urology, Tianjin Institute of Urology, The second hospital of Tianjin Medical University, Tianjin, 300211, China.

<sup>2</sup>Department of Pediatric Surgery, Huai'an Maternal and Children Health Hospital, Huai'an 223002, China.

<sup>3</sup>Urology Development, Chu Hsien-I Memorial Hospital, Tianjin Medical University, Tianjin, 300211, China.

\* These authors contributed equally to this work.

#Corresponding author. Zhiqun Shang: zhiqun\_shang@tmu.edu.cn or Yuanjie Niu: niuyuanjie9317@163.com

Supplementary Figures 1-2

Supplementary Tables 1-2

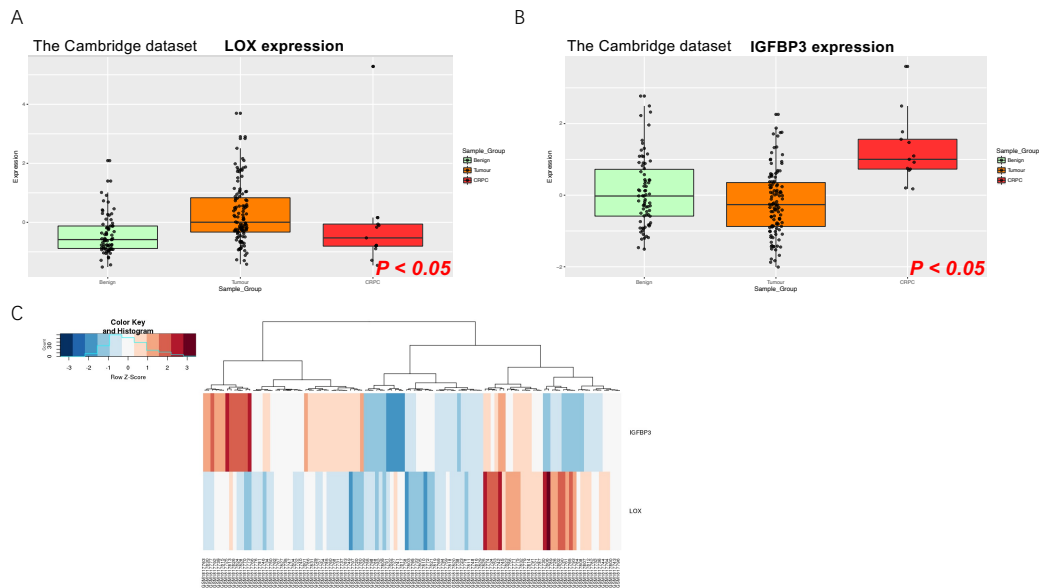

**Supplementary Figure 1. Gene expression profiles in the Cambridge dataset.**  
 (A) The expression of LOX gene in the Cambridge dataset by RNA-seq.  
 (B) The expression of IGFBP3 gene in the Cambridge dataset by RNA-seq.  
 (C) The heatmap of the selected gene expression profiles. Shades of red and blue represents expression values in z-score form.

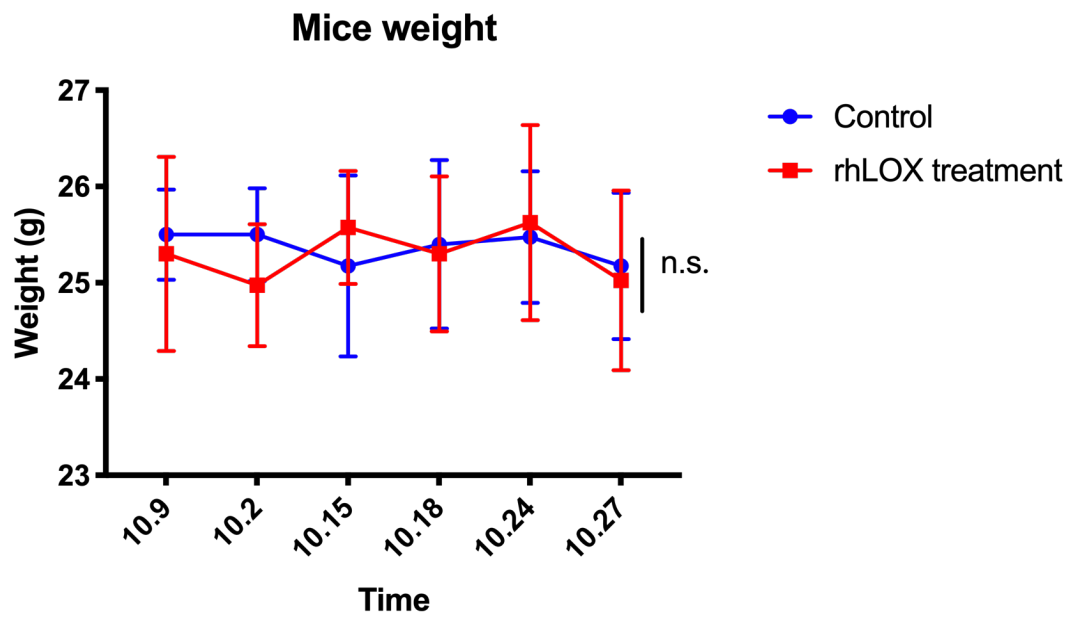

**Supplementary Figure 2. Changes in body weight during the study period.**

**Supplementary Table 1. The main characteristics of the CSPC patients (n=31) and CRPC patients (n=18).**

| Characteristics    |            | CSPC | CRPC |
|--------------------|------------|------|------|
|                    |            | n    | n    |
| Age                |            |      |      |
|                    | < 66 years | 13   | 3    |
|                    | ≥ 66 years | 18   | 15   |
| Gleason score      |            |      |      |
|                    | <8         | 16   | 3    |
|                    | ≥8         | 15   | 15   |
| Pathological stage |            |      |      |
|                    | < T3A      | 24   | 0    |
|                    | ≥ T3A      | 7    | 18   |

(CRPC: castration-resistant prostate cancer; CSPC: castration-sensitive prostate cancer; PSA: prostate specific antigen)

**Supplementary Table 2. All primer and siRNA sequences.**

| Gene                 | Usage | Sequence (5'-3')          |
|----------------------|-------|---------------------------|
| LOX sense#1          | RNAi  | GAAUCUGACUAUACCAACATT     |
| LOX antisense#1      | RNAi  | UGUUGGUUAUAGUCAGAUUCAG    |
| LOX sense#2          | RNAi  | GCACAGUUGUCAUCAACAUTT     |
| LOX antisense#2      | RNAi  | AUGUUGAUGACAACUGUGCCA     |
| IGFBP3 sense#1       | RNAi  | GCAGUGUCGCCCUUCCAAATT     |
| IGFBP3 antisense#1   | RNAi  | UUUGGAAGGGCGACACUGCTT     |
| IGFBP3 sense#2       | RNAi  | CAUUCAAAGAUAAUCAUCATT     |
| IGFBP3 antisense#2   | RNAi  | UGAUGAUUAUCUUUGAAUGGA     |
| GAPDH forward        | Q-PCR | GGAGCGAGATCCCTCCAAAAT     |
| GAPDH reverse        | Q-PCR | GGCTGTTGTCATACTTCTCATGG   |
| LOX forward          | Q-PCR | CGGCGGAGGAAAACCTGTCT      |
| LOX reverse          | Q-PCR | TCGGCTGGGTAAGAAATCTGA     |
| IGFBP3 forward       | Q-PCR | AGAGCACAGATACCCAGAACT     |
| IGFBP3 reverse       | Q-PCR | GGTGATTCAGTGTGTCTTCCATT   |
| GAPDH forward        | Q-PCR | GGAGCGAGATCCCTCCAAAAT     |
| Primer1-M forward    | MSP   | AGTAGATTTAATGGGAGAATAACGG |
| Primer1-M reverse    | MSP   | GAATCAACAAAATCGAAATACGAA  |
| Primer1-U forward    | MSP   | AGTAGATTTAATGGGAGAATAATGG |
| Primer1-U reverse    | MSP   | CAAATCAACAAAATCAAATACAAA  |
| Primer2-M forward    | MSP   | CGAGGAGTTGTTTCGTTTTGTAC   |
| Primer2-M reverse    | MSP   | AAAATTTTAACTTTCTAACACGTT  |
| Primer2-U forward    | MSP   | AGGTGAGGAGTTGTTTGTTTGTAT  |
| Primer2-U reverse    | MSP   | AAAATTTTAACTTTCTAACACATT  |
| Primer3-M forward    | MSP   | AGTAGATTTAATGGGAGAATAACGG |
| Primer3-M reverse    | MSP   | GAATCAACAAAATCGAAATACGAA  |
| Primer3-U forward    | MSP   | GTAGATTTAATGGGAGAATAATGG  |
| Primer3-U reverse    | MSP   | CAAATCAACAAAATCAAATACAAA  |
| Primer1-ChIP forward | ChIP  | AGACTTCGCCTGCCAACG        |
| Primer1-ChIP reverse | ChIP  | CCCTTACCCCTTCCGCTCT       |
| Primer2-ChIP forward | ChIP  | ATTTCAACAGCGTTCAGG        |
| Primer2-ChIP reverse | ChIP  | TTCGGTGACCAACAGAGG        |
| Primer3-ChIP forward | ChIP  | TACCCAAGACAAGAAGAACA      |
| Primer3-ChIP reverse | ChIP  | ACACCGCAAGTCTCCAAT        |
| Primer4-ChIP forward | ChIP  | GGAACGGATGTAAACCTG        |
| Primer4-ChIP reverse | ChIP  | ATAATCGTCGCTTGCTGT        |

(RNAi: RNA interference; Q-PCR: quantitative real-time PCR; MSP: methylation specific PCR; ChIP: chromatin immunoprecipitation)
